# Supplementary material for: Breastfeeding, Cellular Immune Activation, and Myocardial Recovery in Peripartum Cardiomyopathy
Source: PubMed Central journal article supplement — JACC Basic Transl Sci. 2019 Jun 24;4(3):291–300. doi: 10.1016/j.jacbts.2019.01.010 (PMC6609998; doi:10.1016/j.jacbts.2019.01.010), 2019-06-24
Supplement: mmc1.pdf [file mmc1.pdf]

## **IPAC Investigators**

***University of Pittsburgh Medical Center (10)*** Dennis M McNamara, MD;  
James D. Fett, MD; Jessica Pisarcik, RN, BSN; Charles McTiernan, PhD;  
Karen Hanley-Yanez, BS; John Gorcsan III, MD; Erik Schelbert, MD.

***Intermountain Medical Center (8)*** Rami Alharethi, MD; Kismet Rasmusson,  
CRNP; Kim Brunisholz; Amy Butler, BS, CCRP; Deborah Budge; A.G.

Kfoury, MD; Benjamin Horne, PhD; Joe Tuinei; Heather Brown. ***Vanderbilt***

***University (7)*** Julie Damp, MD; Allen J. Naftilan, MD; Jill Russell, RN, MSN;

Darla Freehardt, LPN, BS, CCRP. ***Cleveland Clinic (7)*** Eileen Hsich, MD;

Cynthia Oblak, CCRC. ***Washington University, St. Louis (6)*** Greg Ewald,

MD; Donna Whitehead, RN; Jean Flanagan, RN; Anne Platts. ***University of***

***Southern California (6)*** Uri Elkayam, MD; Jorge Caro, MPH; Stephanie

Mullin, RN. ***Brigham and Women's Hospital (5)*** Michael M. Givertz, MD; M.

Susan Anello, RN, BS. ***University of Kentucky (5)*** Navin Rajagopalan, MD;

David Booth, MD; Tiffany Sandlin, RN; Wendy Wijesiri, RN. ***Mayo Clinic (4)***

Leslie T. Cooper, MD; Lori A. Blauwet, MD; Joann Brunner, RN; Mary

Phelps; Ruth Kempf. ***Louisiana State University (4)*** Kalgi Modi, MD; Tracy

Norwood. ***University of Illinois (4)*** Joan Briller, MD; Decebal Sorin Griza,

MD. ***Duke University (4)*** G. Michael Felker, MD; Robb Kociol, MD; Patricia

Adams, RN. ***Wake Forest (4)*** Gretchen Wells, MD; Vinay Thohan, MD;

Deborah Wesley-Farrington, RN, BSN, CCRC, CCA; Sandra Soots, RN,

CCRC. *Jewish General (3)* Richard Sheppard, MD; Caroline Michel, MD; Nathalie Lapointe, RN, PhD; Heather Nathaniel. *University of Calgary (3)* Angela Kealey, MD. *Massachusetts General (2)* Marc Semigran, MD; Maureen Daher, RN. *Penn State Milton S. Hershey Medical Center (2)* John Boehmer, MD; David Silber, MD; Eric Popjes, MD; Patricia Frey, RN; Todd Nicklas, RN. *University of Rochester (2)* Jeffrey Alexis, MD; Lori Caufield, RN, BSN, CCRC. *Georgia Health Sciences University (2)* John W. Thornton III, MD; Mindy Gentry, MD; Vincent J.B. Robinson, MBBS; Gyanendra K. Sharma, MD; Joan Holloway, BS; Maria Powell, LPN, CCRC. *University of Texas, Southwestern (2)* David Markham, MD; Mark Drazner, MD; Lynn Fernandez, RN. *Newark Beth Israel Medical Center (2)* Mark Zucker, MD; David A. Baran, MD; Martin L. Gimovsky, MD; Natalia Hochbaum, MD; Bharati Patel, RN, CCRC; Laura Adams, RN, BSN. *University of Maryland (2)* Gautam Ramani, MD; Stephen Gottlieb, MD; Shawn Robinson, MD; Stacy Fisher, MD; Joanne Marshall, BSN, MS. *Columbia University (2)* Jennifer Haythe, MD; Donna Mancini, MD; Rachel Bijou, MD; Maryjane Farr, MD; Marybeth Marks, Henry Arango. *Baylor College (2)* Biykem Bozkurt, MD, PhD, FACC, FAHA; Mariana Bolos. *Thomas Jefferson (1)* Paul Mather, MD; Sharon Rubin, MD; Raphael Bonita, MD; Susan Eberwine, RN. *Stony Brook University Medical Center (1)* Hal Skopicki, MD, PhD; Kathleen Stergiopoulos, MD; Ellen McCathy-Santoro, MD; Jennifer Intravaia, RN, CCRCII; Elizabeth Maas. *Morristown Hospital (0)* Jordan Safirstein, MD; Audrey Kleet, RN, MS, ACNP-BC, CCRN, CCTC; Nancy Martinez, RN;

Christine Corpoin, RN; Donna Hesari, RN. *University of Miami (0)* Sandra  
Chaparro, MD; Laura J. Hudson, MA, MPH, CCRC. *Harper University  
Hospital (0)* Jalal K. Ghali, MD; Zora Injic, RN, BSc, MSA. *Johns Hopkins  
Hospital (0)* Ilan S. Wittstein, MD.
